# Supplementary material for: “Two-birds-one-stone” colon-targeted nanomedicine treats ulcerative colitis via remodeling immune microenvironment and anti-fibrosis
Source: J Nanobiotechnology. 2022 Aug 30;20:389. doi: 10.1186/s12951-022-01598-0 (PMC9429315; doi:10.1186/s12951-022-01598-0)
Supplement: Supplementary file 1 — Additional file 1: Figure S1. Effect of PA on macrophage repolarization and synergistic effect with SV. (A–C) The mRNA levels of M1-associated pro-inflammatory cytokines (e.g., IL-1β, IL-6, and TNF-α) in PA-treated RAW264.7 macrophages, as measured by qPCR. (D, E) Western blot analysis of Akt/MAPK/NF-κB pathway-related biomarkers and M2-related MR expression after PA treatment. (F) The mRNA levels of the M1-related pro-inflammatory molecules (e.g., TNF-α, iNOS, and COX-2) and M2-related Arg1 in SV-treated RAW264.7 macrophages, as measured by qPCR. (G) IL-6 mRNA levels in LPS-induced peritoneal macrophages treated with PA (10 μM) and SV (0, 1, and 2 μM). Figure S2. Cytotoxicity study of PA and SV on (A) Caco-2 cells, (B) RAW264.7 cells, and (C) L929 cells. Cytotoxicity of the NPs in (D) L929 cells and (E) M2Φ. Figure S3. Anti-colitis treatment of synergistic drugs. (A) Schematic diagram of DSS-induced colitis and treatment. (B) Changes in daily bodyweight of each group during the trial period. (C) Statistical analysis and (D) images of colon lengths in each group (n = 4). Figure S4. Preliminary biosafety assessment of PA and SV. (A) Organ coefficients. (B) H&E staining of the major organs (Scale bar: 100 μm). Figure S5. Fluorescence images of (A) M1Φ and (B) L929 after incubation with the coumarin 6-labeled NPs (scale bar: 50 µm). (C, E) Histogram and (D, F) mean fluorescence intensity of the NPs-internalized M1Φ (LPS-induced RAW264.7 cells) and L929 cells were analyzed by flow cytometry (n = 3). Figure S6. Specific accumulation of CS-PLGA NPs in inflamed colons. Ex vivo imaging and radiant efficiency of (A, B) organs and (C) colons at 3 h. Ex vivo imaging and radiant efficiency of (D, E) organs and (F) colons at 5 h (n = 3). Figure S7. (A–E) Individual bodyweight curves and (F–J) DAI curves in CMC-Na, DSS, PA/SV, PLGA NPs, or CS-PLGA NPs groups (n = 6). Figure S8. Preliminary biosafety assessment. (A) Organ coefficients. (B) H&E staining of the major organs (Scale b [file 12951_2022_1598_MOESM1_ESM.pdf]

**“Two-birds-one-stone” colon-targeted nanomedicine treats ulcerative colitis via remodeling immune microenvironment and anti-fibrosis**

Jiaxin Zhang, Ante Ou, Xueping Tang, Rong Wang, Yujuan Fan, Yuefei Fang, Yuge Zhao, Pengfei Zhao, Dongying Chen, Bing Wang\*, Yongzhuo Huang\*

**Additional figures and tables**

**Fig. S1** Effect of PA on macrophage repolarization and synergistic effect with SV. (A–C) The mRNA levels of M1-associated pro-inflammatory cytokines (e.g., IL-1 $\beta$ , IL-6, and TNF- $\alpha$ ) in PA-treated RAW264.7 macrophages, as measured by qPCR. (D, E) Western blot analysis of Akt/MAPK/NF- $\kappa$ B pathway-related biomarkers and M2-related MR expression after PA treatment. (F) The mRNA levels of the M1-related pro-inflammatory molecules (e.g., TNF- $\alpha$ , iNOS, and COX-2) and M2-related Arg1 in SV-treated RAW264.7 macrophages, as measured by qPCR. (G) IL-6 mRNA levels in LPS-induced peritoneal macrophages treated with PA (10  $\mu$ M) and SV (0, 1, and 2  $\mu$ M).

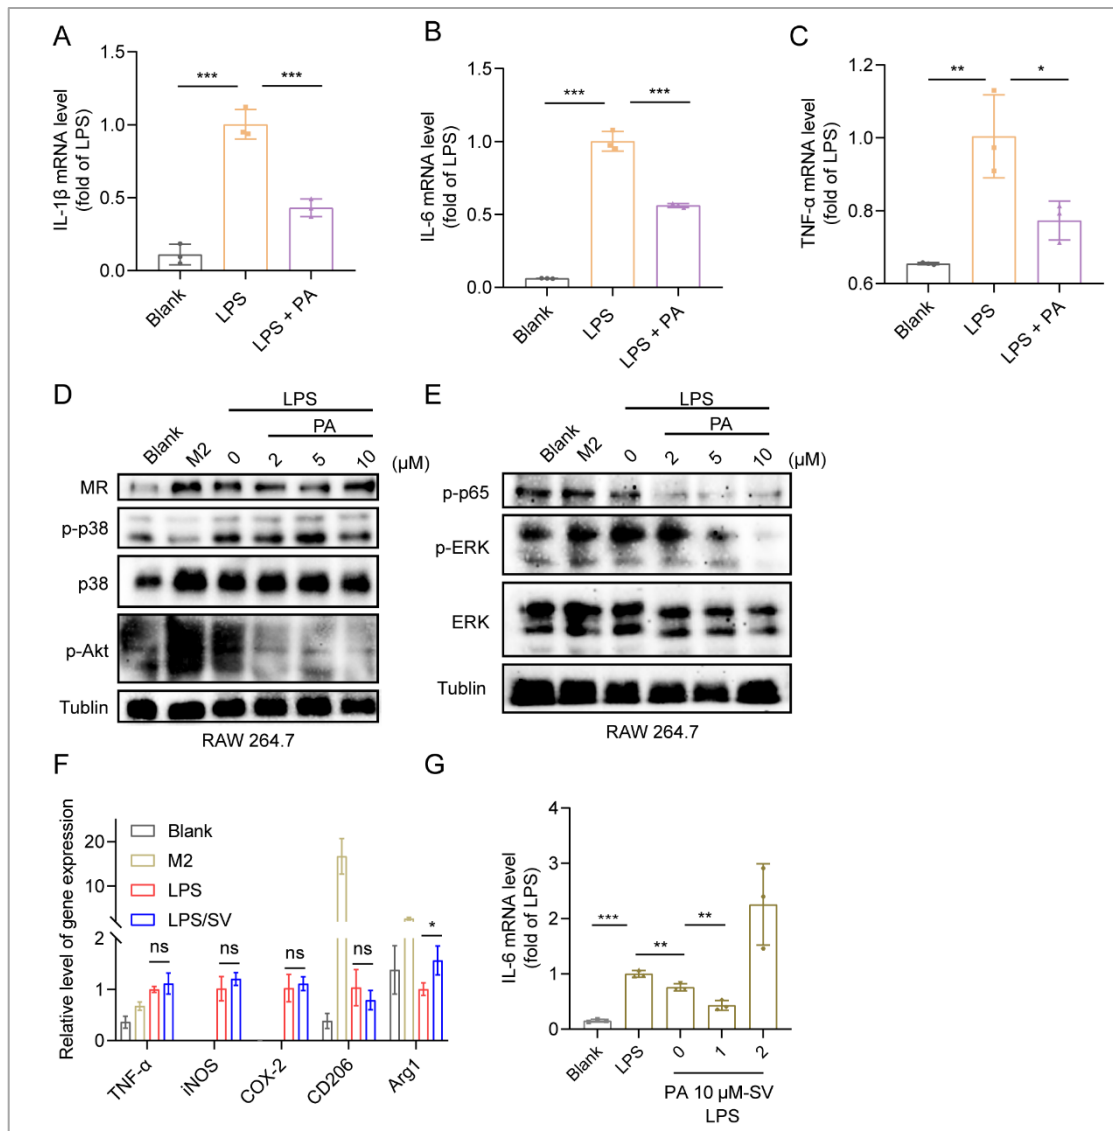

**Fig. S2** Cytotoxicity study of PA and SV on (A) Caco-2 cells, (B) RAW264.7 cells, and (C) L929 cells. Cytotoxicity of the NPs in (D) L929 cells and (E) M2Φ.

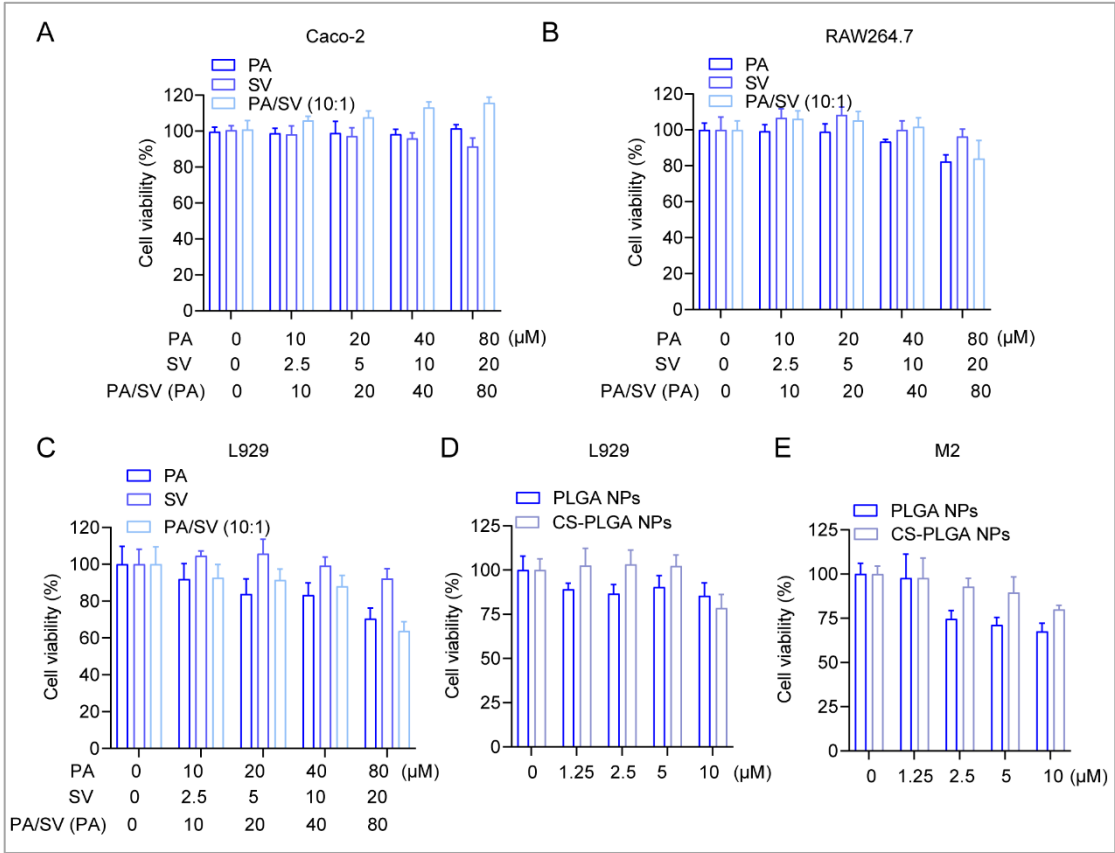

**Fig. S3** Anti-colitis treatment of synergistic drugs. (A) Schematic diagram of DSS-induced colitis and treatment. (B) Changes in daily bodyweight of each group during the trial period. (C) Statistical analysis and (D) images of colon lengths in each group (n = 4).

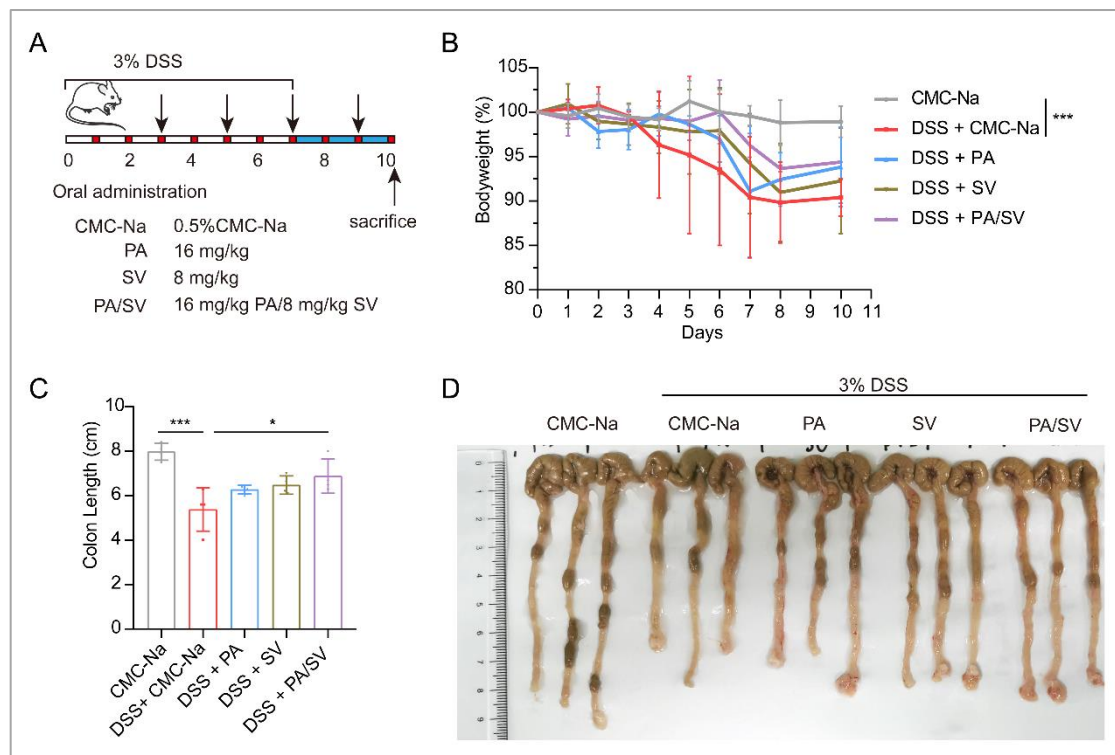

**Fig. S4** Preliminary biosafety assessment of PA and SV. (A) Organ coefficients. (B) H&E staining of the major organs (Scale bar: 100  $\mu$ m).

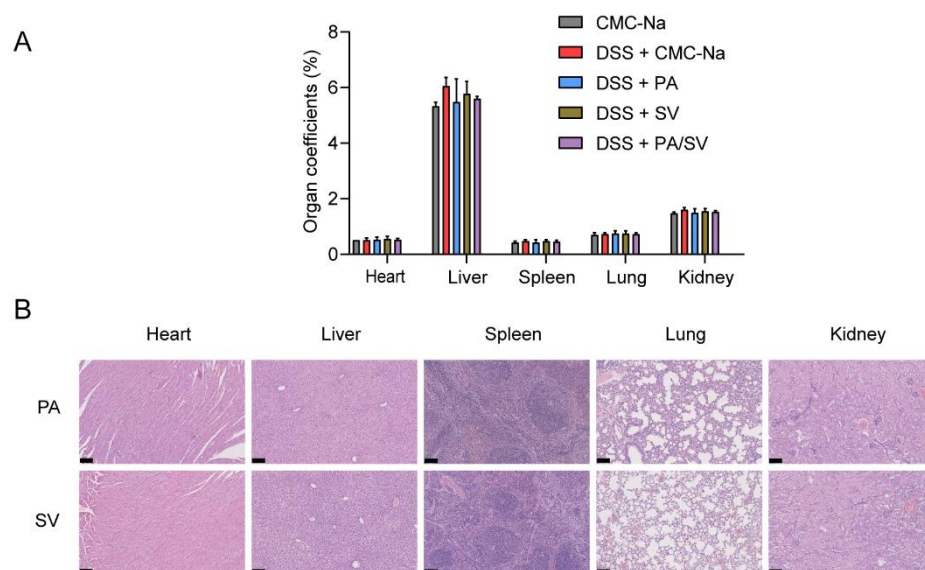

**Fig. S5** Fluorescence images of (A) M1 $\Phi$  and (B) L929 after incubation with the coumarin 6-labeled NPs (scale bar: 50  $\mu$ m). (C, E) Histogram and (D, F) mean fluorescence intensity of the NPs-internalized M1 $\Phi$  (LPS-induced RAW264.7 cells) and L929 cells were analyzed by flow cytometry, (n = 3).

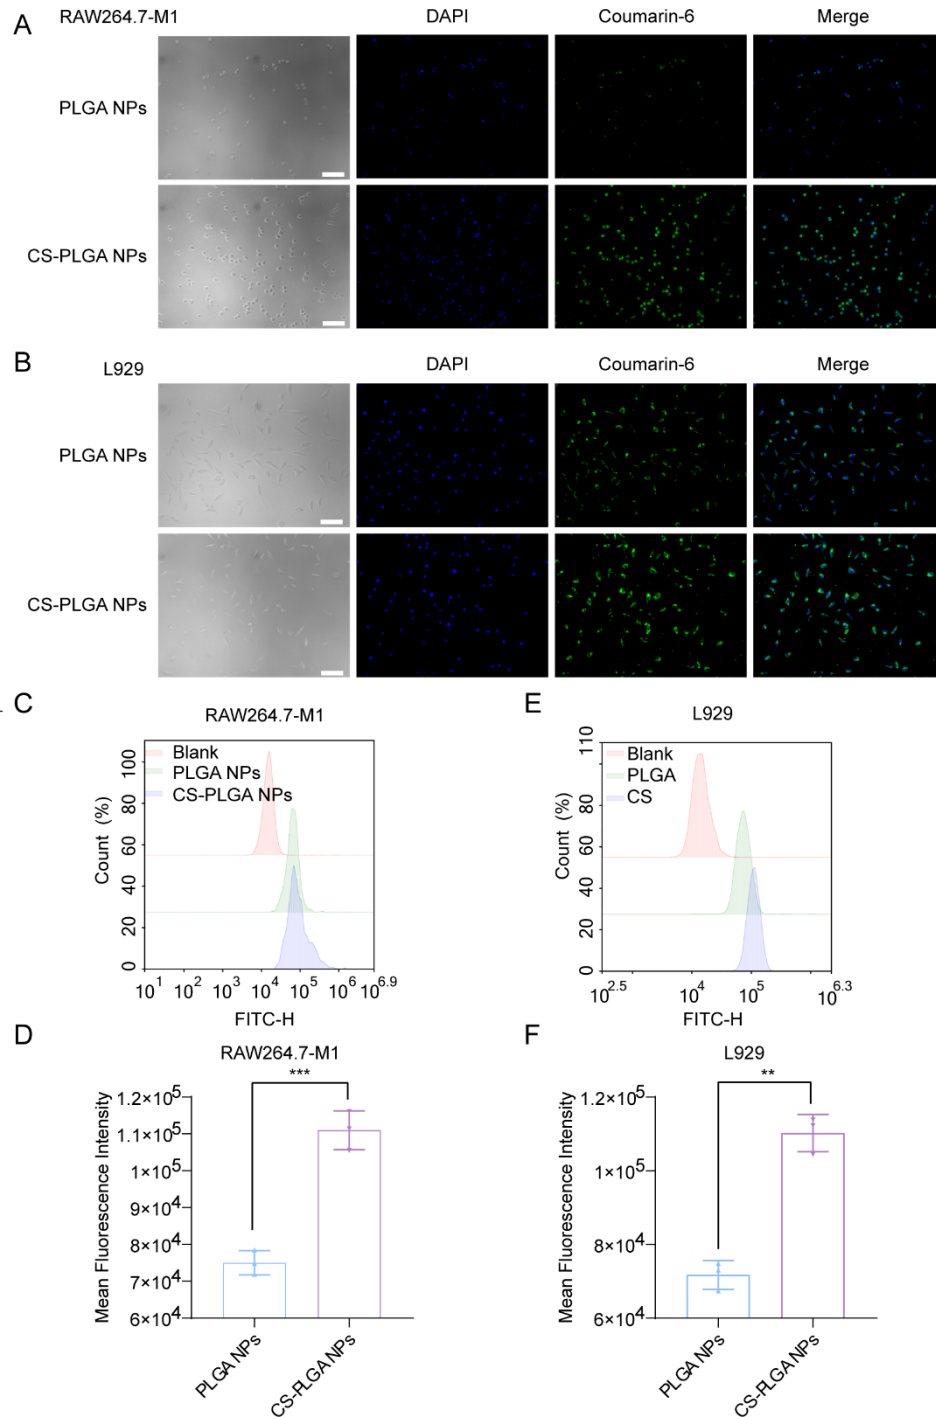

**Fig. S6** Specific accumulation of CS-PLGA NPs in inflamed colons. *Ex vivo* imaging and radiant efficiency of (A, B) organs and (C) colons at 3 h. *Ex vivo* imaging and radiant efficiency of (D, E) organs and (F) colons at 5 h, (n = 3).

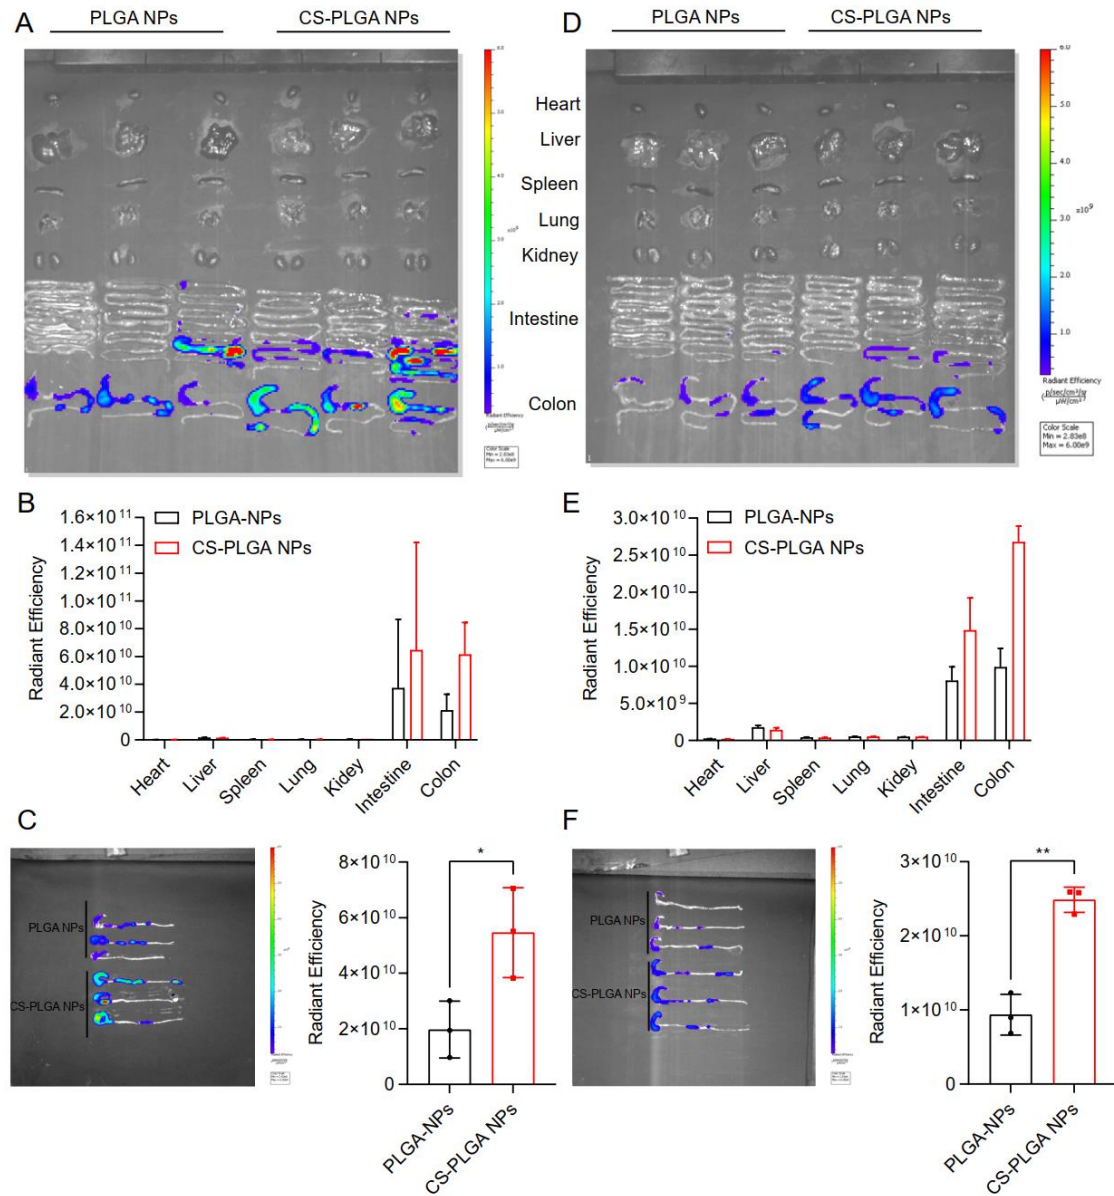

**Fig. S7** (A–E) Individual bodyweight curves and (F–J) DAI curves in CMC-Na, DSS, PA/SV, PLGA NPs, or CS-PLGA NPs groups (n = 6).

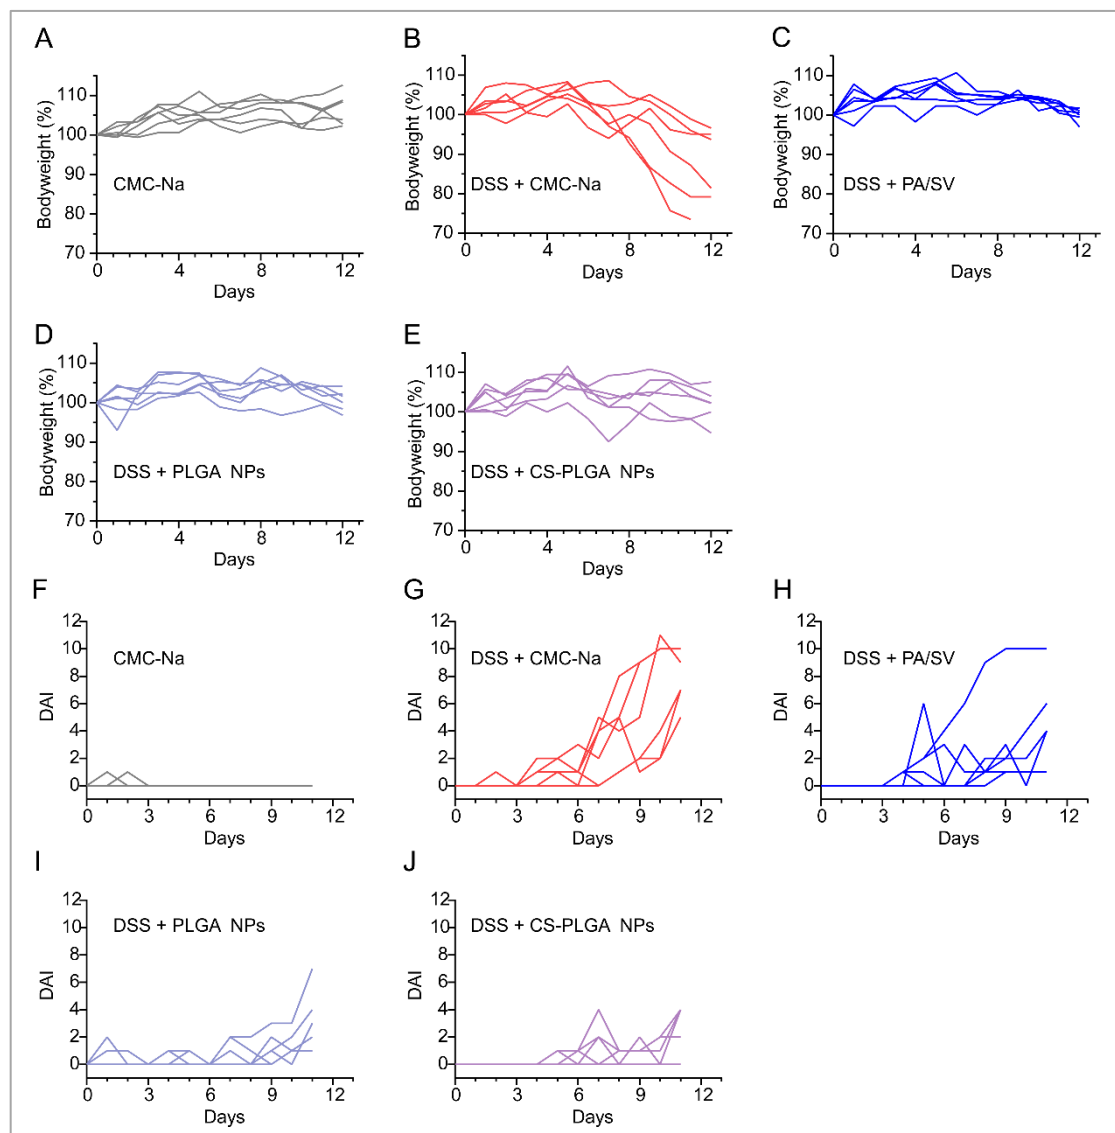

**Fig. S8** Preliminary biosafety assessment. (A) Organ coefficients. (B) H&E staining of the major organs (Scale bar: 100  $\mu$ m).

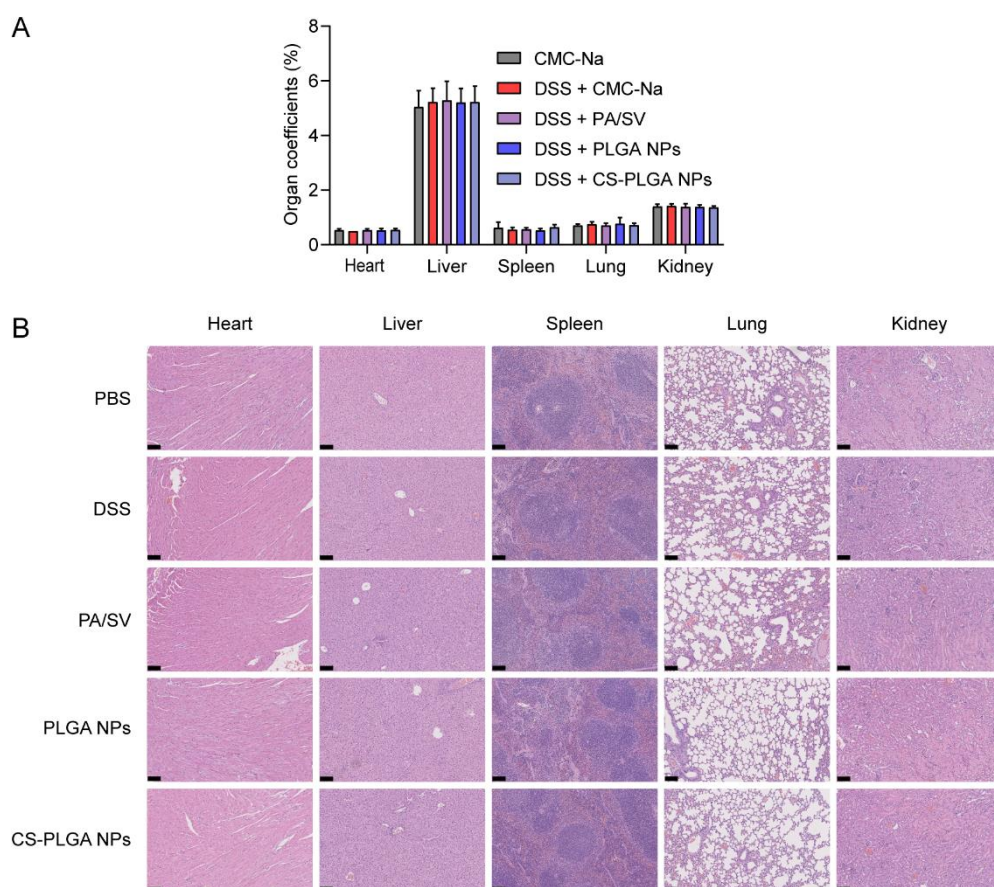

**Fig. S9.** The dot plots of M2 $\Phi$  and DCs in the colon tissue.

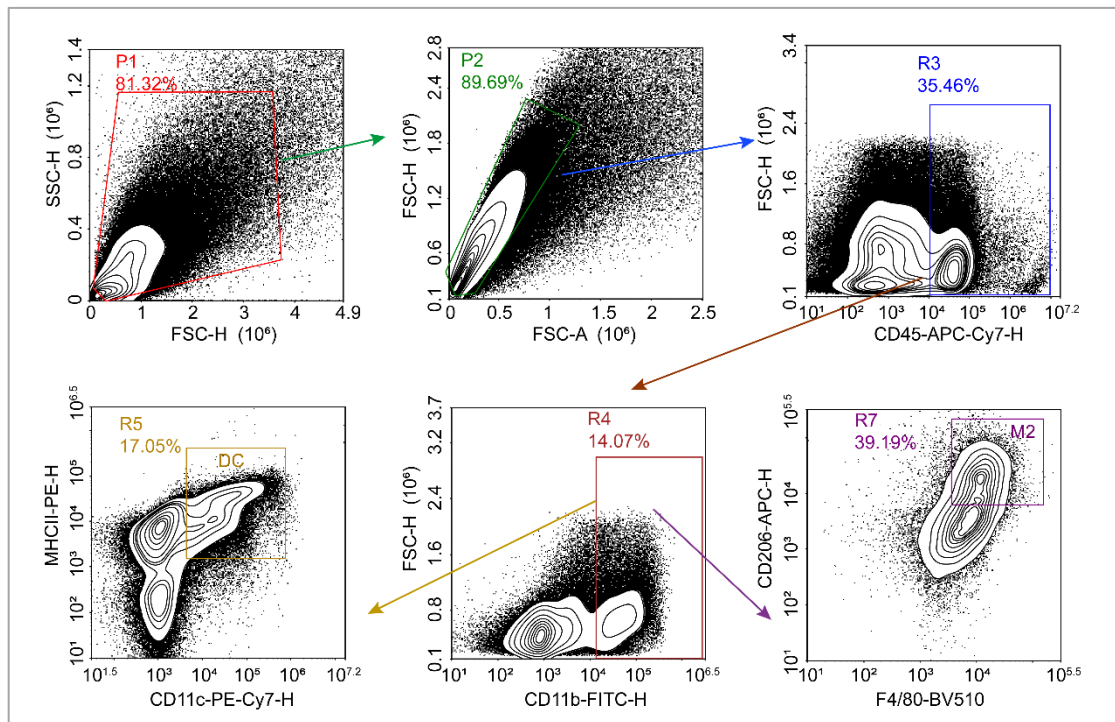

**Fig. S10** The dot plots of neutrophils, inflammatory monocytes, and G-MDSCs in the colon tissue.

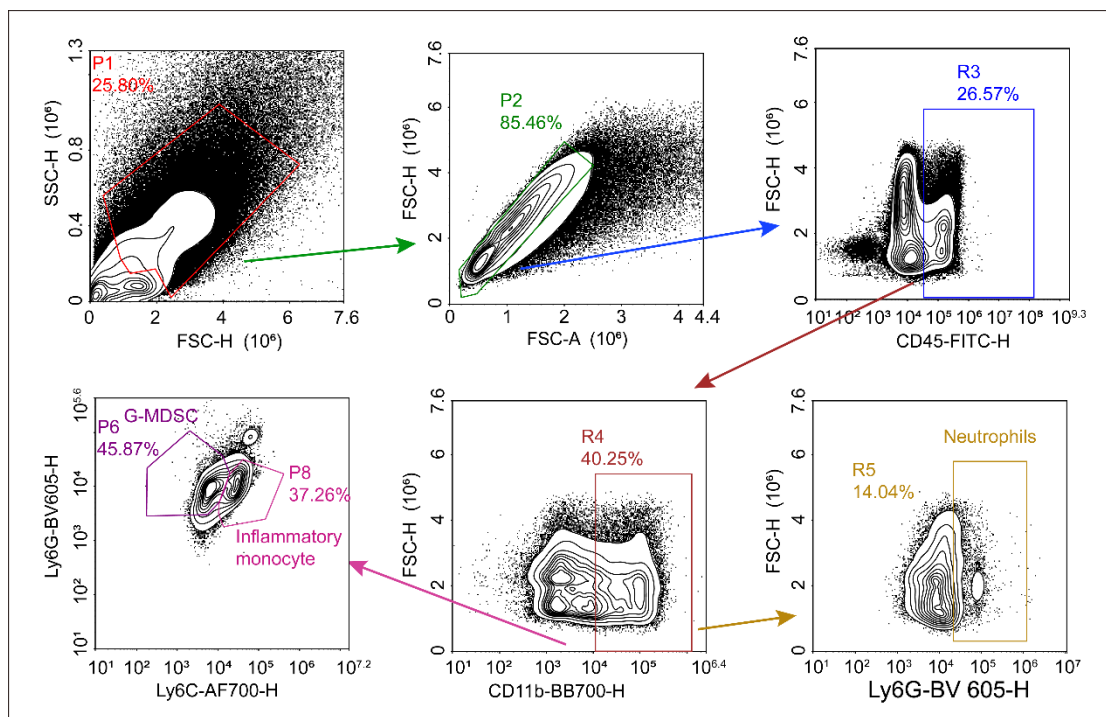

**Fig. S11** The dot plots of Tregs in the colon tissue.

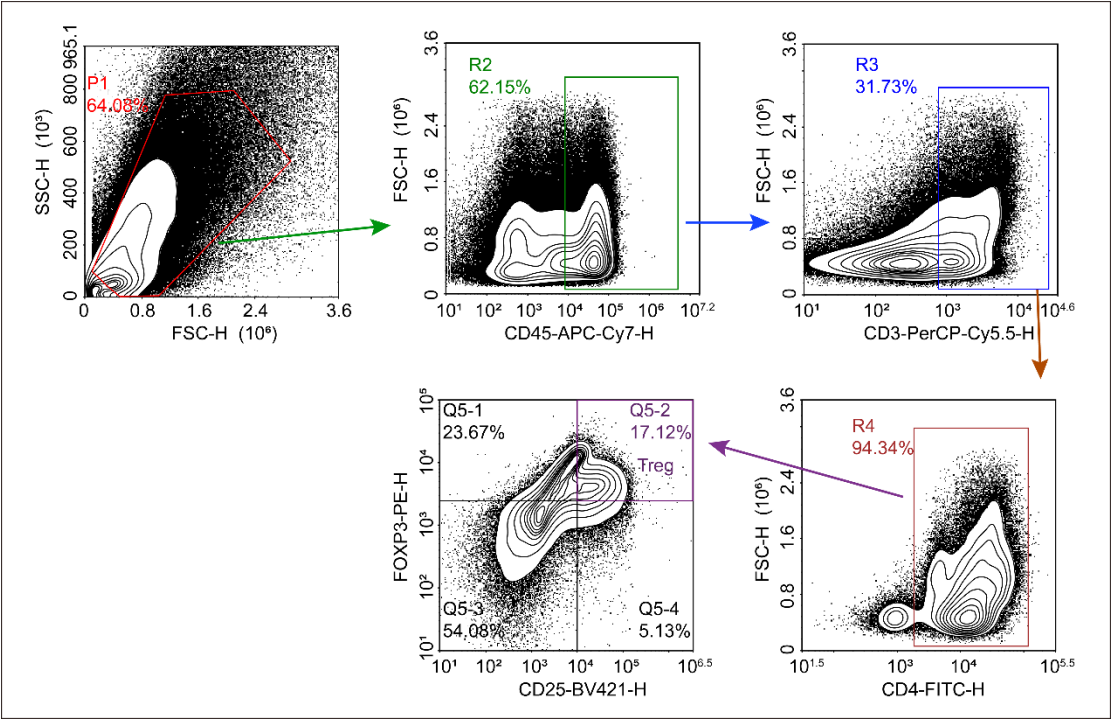

**Table S1** The primer sequence used in qPCR

| Gene             | primer                  |
|------------------|-------------------------|
| TNF- $\alpha$ -F | CGAGTGACAAGCCTGTAGCCC   |
| TNF- $\alpha$ -R | GTCTTTGAGATCCATGCCGTTG  |
| IL-1 $\beta$ -F  | CTTCAGGCAGGCAGTATCACTC  |
| IL-1 $\beta$ -R  | TGCAGTTGTCTAATGGGAACGT  |
| IL-6-F           | ACAACCACGGCCTTCCCTAC    |
| IL-6-R           | TCTCATTTCCACGATTTCCCAG  |
| iNOS-F           | ACATCGACCCGTCCACAGTAT   |
| iNOS-R           | CAGAGGGGTAGGCTTGTCTC    |
| CD86-F           | TTGTGTGTGTTCTGGAAACGGAG |
| CD86-R           | AACTTAGAGGCTGTGTTGCTGGG |
| CD206-F          | TCTTTGCCTTTCCCAGTCTCC   |
| CD206-R          | TGACACCCAGCGGAATTC      |
| Arg1-F           | GAACACGGCAGTGGCTTTAAC   |
| Arg1-R           | TGCTTAGCTCTGTCTGCTTTGC  |
| COX2-F           | TGATCGAAGACTACGTGCAACA  |
| COX2-R           | AAAAGCAGCTCTGGGTCGAA    |
| GAPDH-F          | GGAAGGTGAAGGTCGGAGT     |
| GAPDH-R          | CCTGGAAGATGGTGATGGG     |
| IFN- $\gamma$ -F | AGCAACAGCAAGGCGAAA      |
| IFN- $\gamma$ -R | CTGGACCTGTGGGTTGTTGA    |
| IL-12 F          | AGACATCACACGGGACCAAAC   |
| IL-12 R          | CCAGGCAACTCTCGTTCTTGT   |

**Table S2** Disease activity index (DAI) scoring

| Scores | Weight loss (%) | Stool consistency   | Stool bleeding                |
|--------|-----------------|---------------------|-------------------------------|
| 4      | >15             | watery diarrhea     | -                             |
| 3      | 11-15           | very soft           | visible blood traces in stool |
| 2      | 6-10            | -                   | -                             |
| 1      | 1-5             | slightly soft       | hemocult positive             |
| 0      | none            | well-formed pellets | no blood                      |

**Table S3** Characterization of the NPs

|                         | PLGA-NPs      | CS-PLGA NPs   |
|-------------------------|---------------|---------------|
| Particle mean size (nm) | 372.2 ± 30    | 351.6 ± 21    |
| PDI                     | 0.196 ± 0.037 | 0.202 ± 0.042 |
| Zeta potential (mV)     | -27.2 ± 4.0   | 9.7 ± 4.4     |

**Table S4** Drug encapsulation efficiency and drug loading efficacy

|          | PLGA-NPs    | CS-PLGANPs  |
|----------|-------------|-------------|
| EE (SV)% | 65.3 ± 2.7  | 74.7 ± 6.3  |
| EE (PA)% | 40.2 ± 3.6  | 43.5 ± 0.5  |
| DL (SV)% | 1.3 ± 0.1   | 1.4 ± 0.3   |
| DL (PA)% | 2.08 ± 0.32 | 2.97 ± 0.78 |
